# Supplementary material for: The Efficacy of MAG-DHA for Correcting AA/DHA Imbalance of Cystic Fibrosis Patients
Source: PubMed Central journal article supplement (PMC6025526; doi:10.3390/md16060184), 2018-05-26

## CERTIFICATE OF ANALYSIS

Product Name: **Solutex0060MG**  
 Product Description: Eicosapentaenoic & Docosahexaenoic Acid  
 ( OMEGA 3 MONOGLYCERIDE AND DIGLYCERIDE FATTY ACIDS )  
 Observations: Formulation stabilized with Curcumin and Mixed Natural Tocopherols  
 Lot: Solutex0060MG0915-0808  
 Packing Date: 24-Feb-2015 Shelf Life/ Retest Period: 24-Feb-2016

| General Description |                                                                                  |
|---------------------|----------------------------------------------------------------------------------|
| Appearance:         | Slightly yellow.                                                                 |
| Odor:               | Slight fish odor.                                                                |
| Solubility:         | Almost insoluble in water. Miscible with acetone, ethanol, heptane and methanol. |

| <u>DETERMINATIONS</u>                                                   | <u>SPECIFICATION</u> | <u>RESULT</u> | <u>METHOD</u>   |
|-------------------------------------------------------------------------|----------------------|---------------|-----------------|
| <b><u>Fatty Acid Profile</u></b>                                        |                      |               |                 |
| DHA mg/g (as FFA)                                                       | Min. 600             | 650.7         | Eur.Ph. 2.4.29  |
| Total Omega-3 mg/g (as FFA)*                                            | Min. 600             | 801.3         | Eur.Ph. 2.4.29  |
| Monglyceride content (%A)                                               | Min. 40              | 40.08         | Eur. Ph.2.2.30  |
| *(Sum of 18:3 ω3, 18:4 ω3, 20:4 ω3, 20:5 ω3, 21:5 ω3, 22:5 ω3, 22:6 ω3) |                      |               |                 |
| Free Glycerin (mg/g)                                                    | Max. 70              | 9             | USP Glycerin RS |
| <b><u>Analytical Data</u></b>                                           |                      |               |                 |
| Acid Value (mg KOH/g)                                                   | Max. 4               | 0.28          | Eur.Ph. 2.5.1   |
| <b><u>Contaminant Data</u></b>                                          |                      |               |                 |
| Acetone (mg/kg)                                                         | Max. 5000            | 641           | USP <467>       |
| Arsenic (mg/kg)                                                         | Max. 0.1             | Conforms      | AOAC 986.15     |
| Cadmium (mg/kg)                                                         | Max. 0.1             | Conforms      | AOCS Ca18d-01   |
| Lead (mg/kg)                                                            | Max. 0.1             | Conforms      | AOCS Ca18c-91   |
| Mercury (mg/kg)                                                         | Max. 0.05            | Conforms      | AOAC 971.21     |
| Dioxins & Furans (pg WHO-TEQ/g)                                         | Max 1.75             | Conforms      | EPA 1613        |
| Dioxin- Like PCBs (pg WHO -TEQ/g)                                       | Max. 6.0             | Conforms      | EPA 1668        |
| PCBs (209 Congeners) (mg/kg)                                            | Max 0.09             | Conforms      | EPA 8082        |
| Benzo(A)pPyrene (ng/g)                                                  | Max. 2               | Conforms      | Internal Method |
| <b><u>Microbial Contaminants</u></b>                                    |                      |               |                 |
| Contaminant fungus (CFU/g)                                              | < 10 000             | Conforms      | USP 31 <61>     |
| Total Aerobic Count (CFU/g)                                             | < 10 000             | Conforms      | USP 31 <61>     |
| <i>Escherichia coli</i> (CFU/g)                                         | Absent               | Conforms      | USP 31 <62>     |
| <i>Salmonella spp.</i> (CFU/g)                                          | Absent               | Conforms      | USP 31 <62>     |
| <i>Staphylococcus aureus</i> (CFU/g)                                    | Absent               | Conforms      | USP 31 <62>     |
| <i>Pseudomonas aeruginosa</i> (CFU/g)                                   | Absent               | Conforms      | USP 31 <62>     |
| <b><u>Antioxidant</u></b>                                               |                      |               |                 |
| Total curcuminoid content (mg/g)                                        | 0.5 – 0.8            | 0.53          | Internal Method |
| Sum of Tocopherols (mg/g)                                               | 0.5 – 0.8            | 0.60          | Internal Method |

This product is in accordance with the European legislation and does not contain any GMO.

| Storage                                                                                                                                 |
|-----------------------------------------------------------------------------------------------------------------------------------------|
| Shelf life can be guaranteed if the oil is kept in the original unopened sealed drum, protected from light and heat                     |
| If the product is to be manipulated during a long period, it should be preserved each time in an inert atmosphere (nitrogen or argon).  |
| This product is contained in a pre-sealed drum. If strapping is broken at the moment of the inspection, please contact the manufacturer |
| Standard Packaging Size: 190 Kg                                                                                                         |

Date: 10- March-2015  
QA Approval:

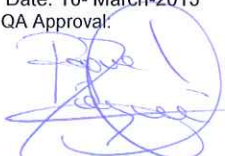

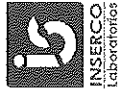

CLIENTE: SOLUCIONES EXTRACTIVAS ALIMENTARIAS, S.A.

|        |                 |
|--------|-----------------|
| N° Reg | 15-0808         |
| Ref    | SOLUTEX 0060 MG |
| ID     |                 |

|                    |       |
|--------------------|-------|
| PEN                | 0060  |
| mg muestra pesados | 40.62 |

|                      |           |           |
|----------------------|-----------|-----------|
| Relac de Calibración | EPA       | DHA       |
| 1.042                | 1.042     | 1.066     |
| Fecha de calibración | 7/25/2014 | 7/25/2014 |

|                         |      |                 |       |
|-------------------------|------|-----------------|-------|
| mg Std int Tricosanoico | 6.13 | % área cromatog | 14.15 |
|-------------------------|------|-----------------|-------|

|            |              |               |
|------------|--------------|---------------|
| RESULTADOS |              |               |
| % de area  | % en peso TG | % en peso FFA |

| Esteres etilicos           | % área cromatog |
|----------------------------|-----------------|
| *Ac. Linolénico            | 18.3 n3         |
| *Ac. Estearidónico         | 18.4 n3         |
| *Ac. Araquidónico AA       | 20.4 n6         |
| *Ac. EicosaTetraenoico ETA | 20.4 n3         |
| Ac. EicosaPentenoico EPA   | 20.5 n3         |
| *Ac. Eneicosapentaenoico   | 21.5 n3         |
| *Ac. DocosaPentenoico DPA  | 22.5 n6         |
| *Ac. DocosaPentenoico DPA  | 22.5 n3         |
| Ac. DocosaHexenoico DHA    | 22.6:n3         |
| suma % area                | 92.6            |

| % área    | % p/p | % p/p |
|-----------|-------|-------|
| 0.00      | 0.00  | 0.00  |
| 0.09      | 0.09  | 0.08  |
| 0.16      | 0.15  | 0.15  |
| 0.23      | 0.22  | 0.21  |
| 3.19      | 2.90  | 2.79  |
| 0.89      | 0.83  | 0.80  |
| 2.02      | 1.88  | 1.81  |
| 12.45     | 11.62 | 11.19 |
| 72.35     | 67.58 | 65.07 |
| 91.38     |       |       |
| * Omega 3 |       | 83.23 |
|           |       | 80.13 |

|                                           |          |
|-------------------------------------------|----------|
| *I de peroxidos (meq/Kg)                  | PEN/0037 |
| *I de anisidina                           | PEN/0328 |
| TOTOX                                     |          |
| *I de peroxidos (meqO/Kg) in situ in situ | PEN/0037 |
| *I de anisidina                           | PEN/0328 |
| *I de acidez (mgKOH/g)                    | PEN/0036 |
| *Absorbancia a 233nm                      | PEN/0054 |
| *Colesterol (mg/g)                        | PEN/0288 |
| *Densidad (g/mL)                          | PEN/0298 |
|                                           | 0.28     |

|                       |          |
|-----------------------|----------|
| *Arsénico (mg/Kg)     | PEN/0255 |
| *Plomo (mg/Kg)        | PEN/0329 |
| *Mercurio (mg/Kg)     | PEN/0254 |
| *Cadmio (mg/Kg)       | PEN/0329 |
| *Color Gardner        | PEN/0038 |
| *Agua K-F (mg/Kg)     | PEN/0162 |
| *Glicerol (mg/g)      | PEN/0143 |
| *Pesticidas           | PEN/0250 |
| Jabon (mg oleato/kg)  | PEN/0111 |
| *PCBs totales (µg/Kg) | PEN/0237 |
| *Acetona (mg/Kg)      | PEN/0232 |
|                       | 641      |

|                                  |       |
|----------------------------------|-------|
| *Oligómeros %A                   | <0.1  |
| *Trigliceridos %A                | <0.1  |
| *Digliceridos %A                 | 6.07  |
| *Monogliceridos %A               | 40.08 |
| *Gliceridos parciales totales %A | 46.16 |
| *Etil Esteres %A                 | 53.84 |

Revisado

GDM

La información completa concerniente a los análisis aquí indicados así como la incertidumbre asociada a los mismos se encuentran a disposición del cliente

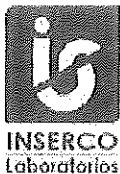

ANALISIS FISICO QUIMICOS Y MICROBIOLÓGICOS  
SERVICIOS TECNOLÓGICOS

**INFORME DE ENSAYO 15/0871-01/01**

|                                                                                                                                                  |                               |                           |
|--------------------------------------------------------------------------------------------------------------------------------------------------|-------------------------------|---------------------------|
| <b>IDENTIFICACIÓN DEL CLIENTE</b>                                                                                                                |                               |                           |
| NOMBRE SOLUTEX GC, S.L.<br>DIRECCIÓN Polígono Industrial El Zafranar, Parcela 22<br>50550 MALLÉN<br>TELÉFONO 976866314 FAX 976850123<br>CONTACTO |                               |                           |
| <b>TOMA DE MUESTRAS</b>                                                                                                                          |                               |                           |
| Responsable                                                                                                                                      | Muestra tomada por el cliente | Nº Acta                   |
| Fecha de Toma de Muestra                                                                                                                         | Hora                          |                           |
| Punto de Toma de Muestra                                                                                                                         |                               |                           |
| Procedimiento de Toma de Muestra                                                                                                                 |                               |                           |
| Identificación de la Muestra                                                                                                                     |                               |                           |
| Contenida en                                                                                                                                     |                               |                           |
| Observaciones                                                                                                                                    |                               |                           |
| <b>RECEPCIÓN</b>                                                                                                                                 |                               |                           |
| MUESTRA DE: Esteres etílicos                                                                                                                     |                               | Nº DE REGISTRO 15/0871-01 |
| S/RFA: SOLUTEX 0060 MG 2                                                                                                                         |                               |                           |
| Fecha de Recepción: 24/02/2015                                                                                                                   | Hora: 18:20                   |                           |
| Contenida en: Bote de plástico                                                                                                                   |                               |                           |
| Observaciones del Laboratorio                                                                                                                    |                               |                           |
| <b>ANÁLISIS</b>                                                                                                                                  |                               |                           |
| Fecha de Inicio 24/02/2015                                                                                                                       | Fecha de Fin 09/03/2015       |                           |

| PARÁMETRO             | Resultado <sup>1</sup> | P. de Ensayo | Método                    |
|-----------------------|------------------------|--------------|---------------------------|
| Curcumina (mg/g)      | 0,53                   | PEN/0094     | Cromatografía Líquidos    |
| MixTocoferoles (mg/g) | 0,60                   |              | Cromatografía de Líquidos |

**OBSERVACIONES**

<sup>1</sup> Los resultados expresados como "<" indican el Límite de Cuantificación del método.  
Las incertidumbres de medida se encuentran a disposición del cliente.  
Los resultados obtenidos son únicamente representativos de la muestra objeto de los ensayos.  
Este documento no podrá reproducirse ni total ni parcialmente, sin la autorización expresa del laboratorio.

09 de marzo de 2015

Gloria Delgado Marquez  
Jefe de Laboratorio

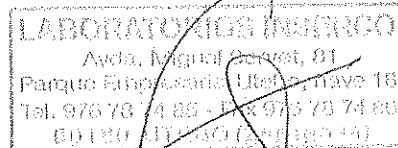

Supplement: marinedrugs-16-00184-s001.pdf [file marinedrugs-16-00184-s001.pdf]
